# Supplementary material for: Primary productivity as a control over soil microbial diversity along environmental gradients in a polar desert ecosystem
Source: PeerJ. 2017 Jul 25;5:e3377. doi: 10.7717/peerj.3377 (PMC5530992; doi:10.7717/peerj.3377)
Supplement: Supplemental Information 2 [file peerj-05-3377-s002.xlsx]

## Sheet: Sheet1
ID	Sub	CHLA (ug/g dry soil)	ID (2013)	K-means CHLA class	K-means moisture class	Ave CHLA (2013)	pH (2013)	specific cond. (2013)	Water Content % (2013)	MB	NH4-N KCl (2013)	NO3-N KCl (2013)	agluc (MBC specific, sqrt)	bgluc (MBC specific, sqrt)	NAG (MBC specific, sqrt)	LAP (MBC specific, sqrt)	POX (MBC specific, sqrt)	enzyme H' (MBC specific, sqrt transformed)	total enzyme activity	enzyme H' C only(MBC specific, untransformed)	enzyme evenness (2013)	β/α-gluc activity (MBC specific, sqrt transformed)		bacterial H' (2013) TRFLP	bacterial richness (2013) TRLFP	bacterial H' (2010)	bacterial richness (2010)	bacterial evenness (2010)	sqrt SOC (2010)	Ave YII (2013)	Ave PAR (2013)	Ave Temp (2013)	Ave ETR (2013)	GPP (umol O2 m-2 s-1)	TN (CHN) (mg N/kg dry)	OC (CHN) (mg C/kg dry)	MBC/OC ratio	C:N (molar)	Invert abundance (2010/2011)
BORI	H1	0.978011	SSLH-L	1	1	0.0179214	8.81	43.6	5.21544	8.01163	0	0	62.4909	76.4788	39.5581	1067.15	4196.57	0.666912	5442.24	0.00599396	0.414376	1.22384	SSLH-L AVE	4.06677	116	3.18954	27	0.967747	19.3478						31.3937	225.778	3.54846	8.38697	1049.51
BORI	H2	0.6761	WORM-L	1	1	0.0364359	8.8	166.1	1.372	3.32434	0.0809133	0.305111	64.2862	81.8663	48.8293	1305.36	6607.73	0.576336	8108.08	0.00306286	0.358098	1.27347	WORM-L AVE	4.05795	112	3.03912	25	0.944157	18.7791	0.004	259.167	6.1	0.1	0.025	29.9982	187.118	1.7766	7.27422	929.538
BORI	H3	1.70932	BORI-L	1	1	0.174766	8.69	89	5.23542	10.9733	0.0726329	0.619309	99.8863	95.6397	30.8307	965.966	3751.96	0.715226	4944.29	0.0119669	0.444395	0.957485	BORI-L AVE			2.89206	22	0.935625	20.8337	0.109857	43.7143	5.85714	2.02857	0.507143	42.5737	289.554	3.78973	7.93149	62.6004
BORI	L1	0.070791	BORI-M	1	2	0.211269	8.6	38.8	13.6654	15.4835	0.0454441	0.0566125	91.9569	106.975	32.4862	917.046	3075.12	0.776528	4223.58	0.0176007	0.482484	1.16331	BORI-M AVE	4.18914	133	2.89752	22	0.937393	22.6686	0.0731429	56	1.05714	1.68571	0.421429	48.6819	331.55	4.67005	7.94231	1031.42
BORI	L2	0.107062	GRCR-L	1	2	0.291846	8.84	36.8	11.9763	5.7223	0.0823835	0.0296125	119.783	160.348	51.6533	1242.25	4139.49	0.789104	5713.53	0.019502	0.490298	1.33866	GRCR-L AVE	4.39982	122	3.11041	26	0.95467	20.4155	0.231	428.714	9.78571	41.3286	10.3321	35.5497	256.695	2.22922	8.42069	3004.79
BORI	L3	0.346446	SSLH-M	2	2	0.376837	8.8	41.6	8.56105	12.8548	0.0196627	0.0236244	70.8408	87.4772	47.2145	1264.57	3618.1	0.761254	5088.2	0.00997286	0.472993	1.23484	SSLH-M AVE	4.21871	114	2.60294	21	0.854958	21.4929						42.8056	301.78	4.25965	8.22157	772.817
BORI	M1	0.1424	CAST-L	2	2	0.529812	8.64	54.8	9.06775	12.6314	0.0584452	0.0138807	79.7145	113.031	39.3227	693.183	2347.02	0.827006	3272.27	0.0278258	0.513847	1.41795	CAST-L AVE	4.06976	112	2.82334	23	0.900446	26.74	0.004	117.5	11.05	0.1	0.025	58.6578	433.823	2.91164	8.62488	974.418
BORI	M2	0.140897	WORM-M	2	2	0.652077	8.73	94.5	12.2255	8.20881	0	0.236653	79.6498	84.642	38.1677	1011.24	3966.75	0.690902	5180.44	0.00845801	0.429281	1.06268	WORM-M AVE			3.02416	25	0.939509	23.9085	0.2155	135.75	5.2875	12.275	3.06875	28.0597	172.179	4.76759	7.15591	1111.76
BORI	M3	0.350509	CAST-M	2	2	1.18326	8.94	59.8	12.294	8.66511	0.0780059	0.0734618	146.742	163.073	46.2808	1014.14	3478.36	0.829884	4848.59	0.0302869	0.515636	1.11129	CAST-M AVE	4.37959	133	3.19355	28	0.95839	40.6114	0.366833	264.5	6.05	40.6667	10.1667	69.0777	668.471	1.29626	11.2852	1249.04
CAST	H1	1.23083	SSLH-H	3	2	1.86961	8.7	55.9	12.7836	26.9646	0.0428626	0.134328	80.1611	118.308	55.6561	624.823	2473	0.812849	3351.95	0.0287066	0.505051	1.47587	SSLH-H AVE	4.12464	116	2.81947	22	0.912142	27.9132						104.533	761.682	3.54013	8.49743	2430.38
CAST	H2	2.43562	GRCR-H	2	3	0.792134	8.31	13.65	16.4897	14.9038	0.0174651	0.0191836	112.885	163.082	45.3132	832.296	3076.2	0.822322	4229.78	0.0314875	0.510938	1.44468	GRCR-H AVE	4.28896	131	2.99025	25	0.928974	26.5532	0.367889	473.222	12.3111	70.9778	17.7444	59.9607	465.754	3.19994	9.05848	501.834
CAST	H3	2.63834	GRCR-M	2	3	0.950649	8.56	20.57	14.127	7.22252	0.0619296	0.0401179	105.651	155.291	61.1504	1017.65	4040.49	0.760421	5380.23	0.0188779	0.472476	1.46985	GRCR-M AVE	4.22604	117	3.09561	27	0.93925	25.8983	0.065	523.4	8.46	13.98	3.495	36.2196	262.453	2.75193	8.45034	946.772
CAST	L1	0.175909	BORI-H	2	3	1.12114	8.39	17.05	16.3	22.4864	0.0205895	0.123789	165.254	175.585	49.2224	874.017	2382.32	0.964879	3646.4	0.0673311	0.599513	1.06252	BORI-H AVE	4.10349	113	2.46183	17	0.868917	23.7904	0.261667	237.333	1.73333	26.0833	6.52083	67.0059	481.119	4.67377	8.37346	333.543
CAST	L2	0.858023	CAST-H	3	3	2.1016	8.56	35.45	15.0511	24.4719	0.108421	0.132865	127.19	180.147	45.7578	713.272	2263.22	0.93393	3329.59	0.0627728	0.580284	1.41637	CAST-H AVE	4.31441	134	3.04785	26	0.935471	50.499	0.561667	70.8333	7.1	16.7167	4.17917	107.454	789.714	3.09884	8.57061	1475.79
CAST	L3	0.555503	WORM-H	3	3	2.84245	8.68	46.1	17.3063	8.7562	0.0389532	0.120848	80.2685	109.44	46.9164	1113.75	3673.32	0.755993	5023.7	0.0128213	0.469725	1.36343	WORM-H AVE	4.40837	131	2.93597	23	0.936367	28.4096	0.246	110.143	3.2	11.5571	2.88929	34.3726	194.529	4.50124	6.59991	1234.81
CAST	M1	1.0172
CAST	M2	1.04165
CAST	M3	1.49092
GRCR	H1	0.820898
GRCR	H1	0.294158
GRCR	H3	1.26135
GRCR	L1	0.583781
GRCR	L2	0.175928
GRCR	L3	0.115829
GRCR	M1	0.503218
GRCR	M2	1.47133
GRCR	M3	0.877395
SSLH	H1	2.57243
SSLH	H2	0.828897
SSLH	H3	2.20752
SSLH	L1	0.0349134
SSLH	L2	0.01
SSLH	L3	0.00885083
SSLH	M1	0.419784
SSLH	M2	0.0701401
SSLH	M3	0.640586
WORM	H1	0.857677
WORM	H2	6.76024
WORM	H3	0.909432
WORM	L1	0.01
WORM	L2	0.0893076
WORM	L3	0.01
WORM	M1	0.707613
Worm	M2	0.629882
WORM	M3	0.618738
																													POX
																													#DIV/0!
																													#DIV/0!
																													#DIV/0!
